# Supplementary material for: Fabrication of Ternary Titanium Dioxide/Polypyrrole/Phosphorene Nanocomposite for Supercapacitor Electrode Applications
Source: MDPI journal article supplement (doi:10.3390/molecules29102172), 2024-05-07
Supplement: s1 [file s1]

*Supplementary Materials*

# **Fabrication of Ternary Titanium Dioxide/Polypyrrole/ Phosphorene Nanocomposite for Supercapacitor Electrode Applications**

**Seungho Ha and Keun-Young Shin \***

Department of Materials Science and Engineering, Soongsil University 369, Sangdo-ro, Dongjak-gu, Seoul  
06978, Republic of Korea; hsho312@naver.com

\* Correspondence: skykek@ssu.ac.kr

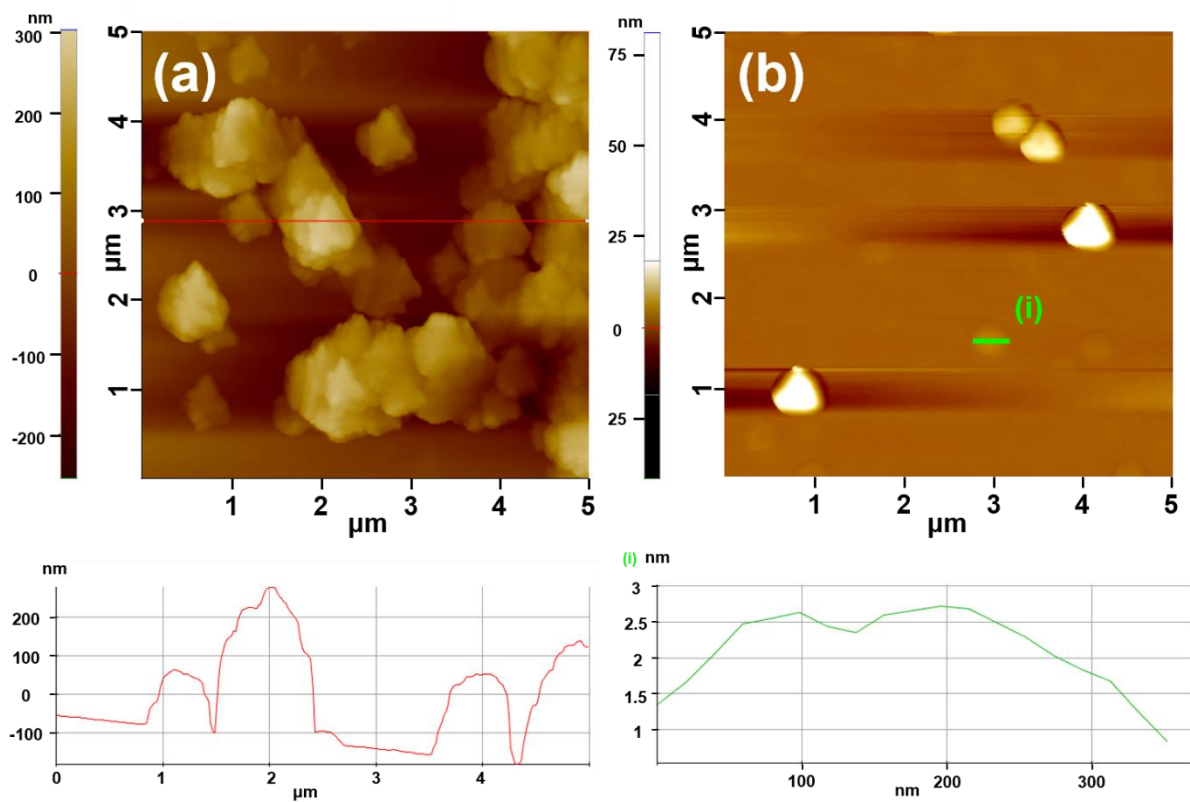

**Figure S1.** Representative AFM images and height profile of (a) black phosphorus and (b) phosphorene nanosheet.

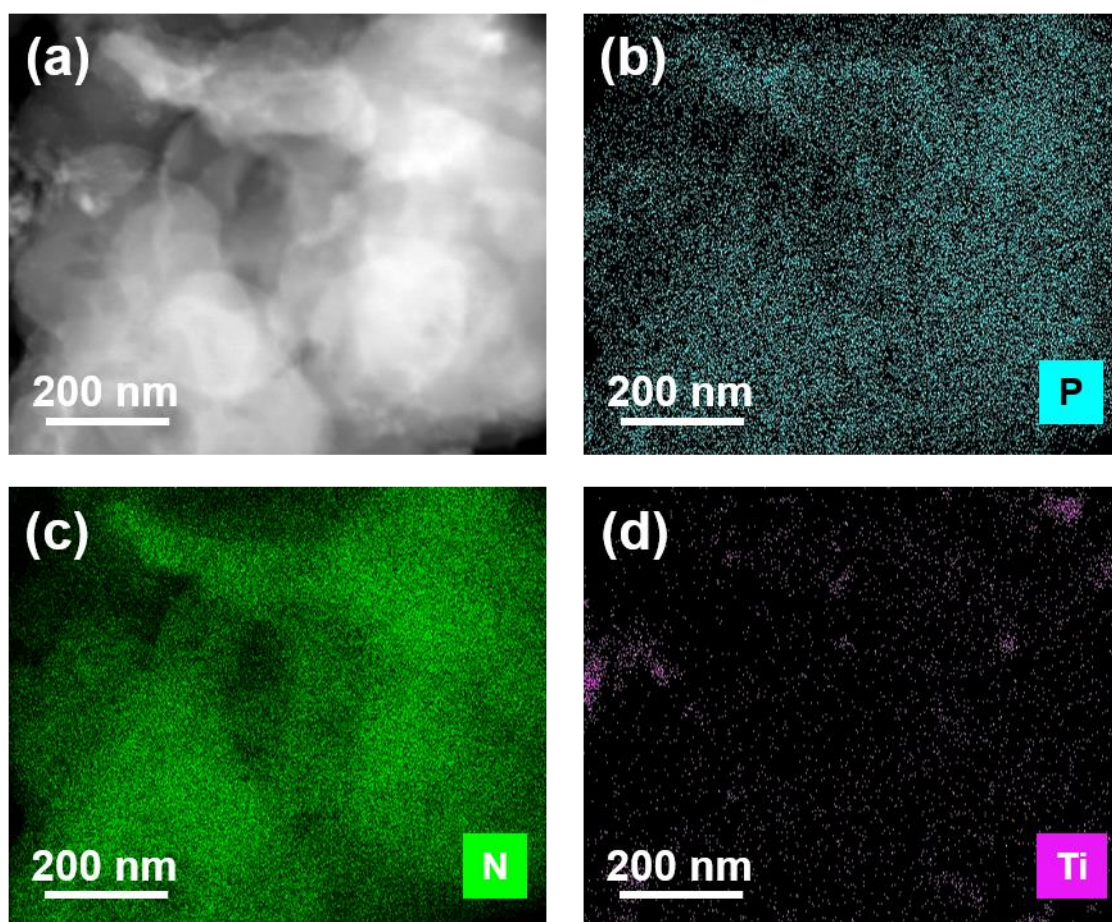

**Figure S2.** (a) HAADF-STEM and (c-d) EDS mapping images of ternary nanocomposite: (b) P (mint), (c) N (green), (d) Ti (purple).

**Table S1.** Specific capacitances of ternary nanocomposite-based supercapacitors with different molar ratio of the components.

|          | Mol(%)  |                 |                               | Specific capacitance (Fg <sup>-1</sup> ) |
|----------|---------|-----------------|-------------------------------|------------------------------------------|
|          | Urea-FP | Pyrrole monomer | TiO <sub>2</sub> nanoparticle |                                          |
| Sample 1 | 28%     | 59%             | 13%                           | 502.6                                    |
| Sample 2 | 56%     | 33%             | 11%                           | 400                                      |
| Sample 3 | 34%     | 33%             | 33%                           | 388                                      |
| Sample 4 | 14%     | 83%             | 3%                            | 203.12                                   |
| Sample 5 | 2%      | 95%             | 3%                            | 132.8                                    |

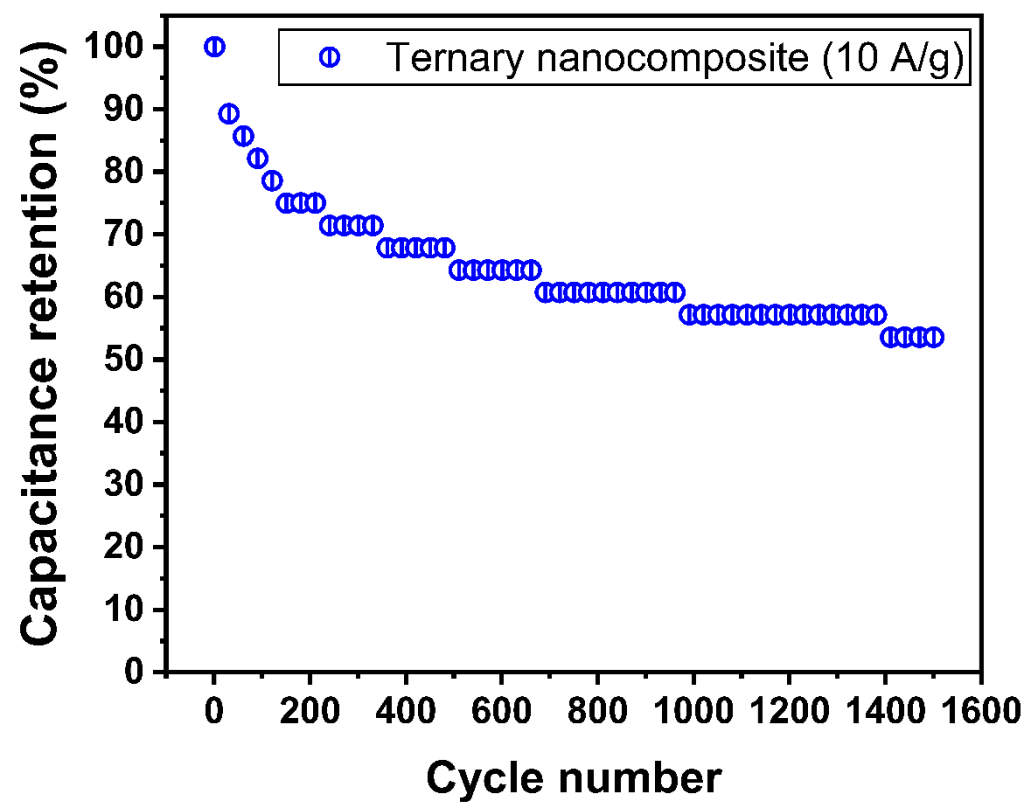

**Figure S3.** Cycle stability of ternary nanocomposite-based supercapacitor. The capacitance retentions were characterized at a current density of 10 A g<sup>-1</sup>.
